# Supplementary material
Source: publisher figshare collection journal article supplement (https://acs.figshare.com/ndownloader/files/5824110)
Supplement: Supplementary file 1 [file 5824110]

# Macromolecules

Macromolecules, 1997, 30(11), 3414-3416, DOI:[10.1021/ma9610222](https://doi.org/10.1021/ma9610222)

## Terms & Conditions

Electronic Supporting Information files are available without a subscription to ACS Web Editions. The American Chemical Society holds a copyright ownership interest in any copyrightable Supporting Information. Files available from the ACS website may be downloaded for personal use only. Users are not otherwise permitted to reproduce, republish, redistribute, or sell any Supporting Information from the ACS website, either in whole or in part, in either machine-readable form or any other form without permission from the American Chemical Society. For permission to reproduce, republish and redistribute this material, requesters must process their own requests via the RightsLink permission system. Information about how to use the RightsLink permission system can be found at <http://pubs.acs.org/page/copyright/permissions.html>

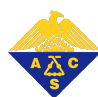

ACS Publications

MOST TRUSTED. MOST CITED. MOST READ.

Copyright © 1997 American Chemical Society

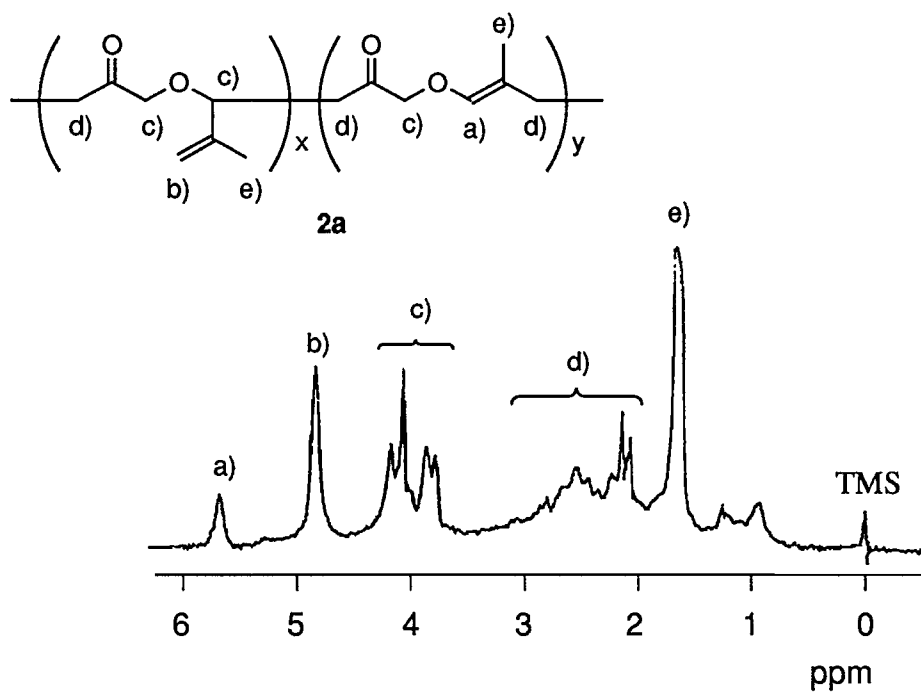

Figure S1. <sup>1</sup>H-NMR spectrum (90 MHz, CDCl<sub>3</sub>) of **2a** obtained by photo-initiated cationic polymerization by **3** at ambient temperature for 1 h.

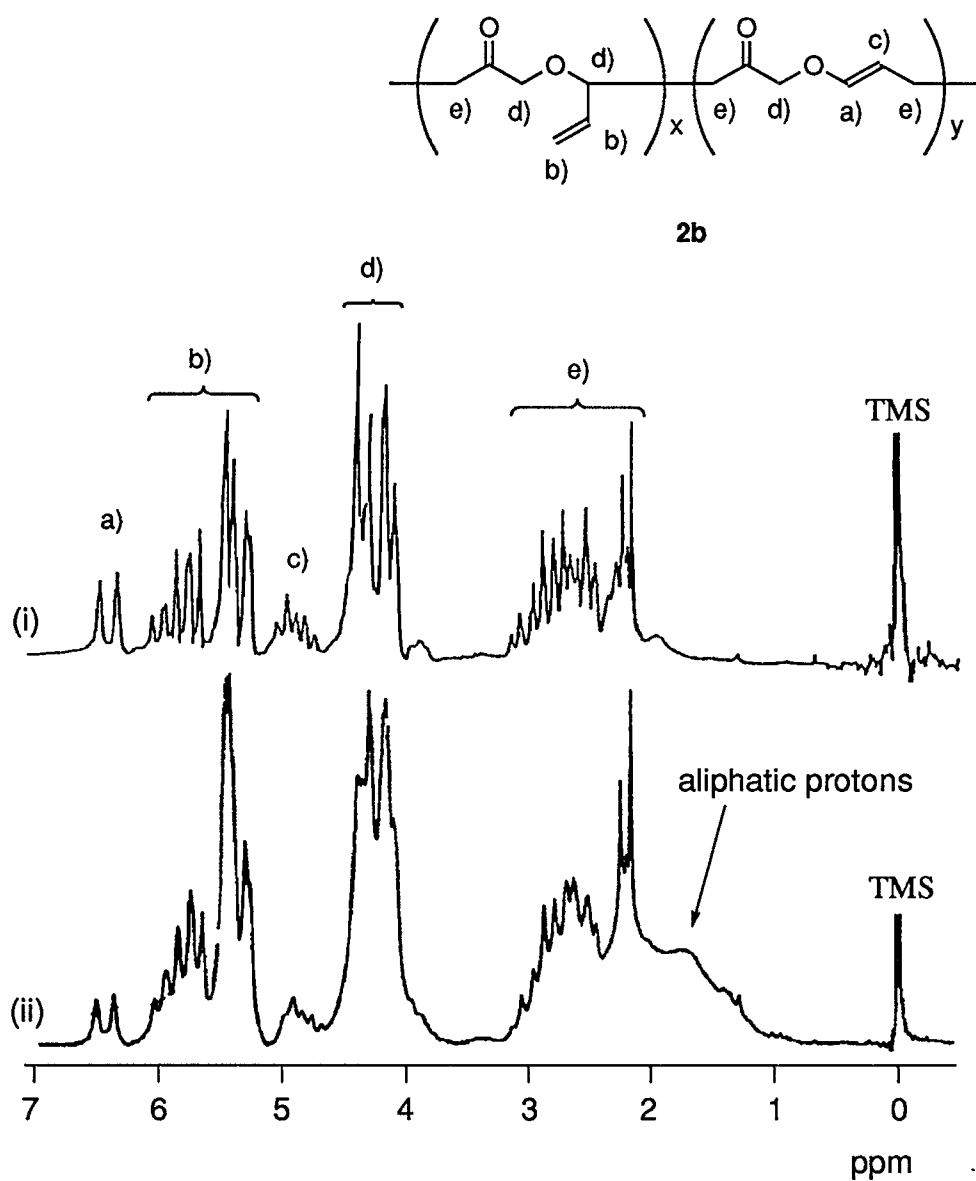

Figure S2.  $^1\text{H}$ -NMR spectrum (90 MHz,  $\text{CDCl}_3$ ) of **2b** obtained by (i) cationic polymerization initiated by methanesulfonic acid at  $-78\text{ }^\circ\text{C}$  and (ii) photo-initiated cationic polymerization by **3** at ambient temperature for 1 h.

Table S1. Heat of Formations of **6** and **7** (Model Structures of Unit I and II of **2**).<sup>a)</sup>

| model structure | the most stable structure <sup>b)</sup><br>(local minimum structure) | heat of formation<br>(kcal/mol) |
|-----------------|----------------------------------------------------------------------|---------------------------------|
| <b>6a</b>       |                                                                      | -46.19                          |
| <b>7a-E</b>     |                                                                      | -51.47                          |
| <b>7a-Z</b>     |                                                                      | -51.32                          |

Table S1. (continued)

| model structure | the most stable structure <sup>b)</sup><br>(local minimum structure)                | heat of formation<br>(kcal/mol) |
|-----------------|-------------------------------------------------------------------------------------|---------------------------------|
| <b>6b</b>       | 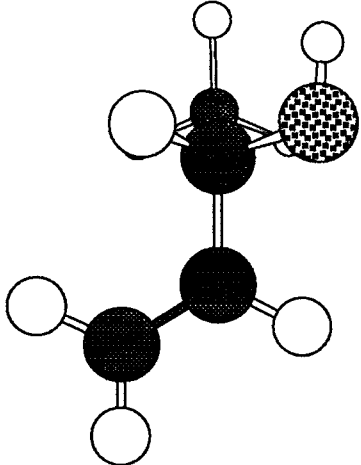   | -37.75                          |
| <b>7b-E</b>     |   | -43.61                          |
| <b>7b-Z</b>     |  | -42.66                          |

a) Calculations were carried out using program MOPAC with PM3 hamiltonian with PRECISE key word.

b) structures were placed as -C=C-C- plane was parallel to the paper.

Table S2. Coefficient of LUMO of **8** (Model Structure of Terminal Oxyallyl Cation **5**).<sup>a)</sup>

| model<br>structure | most stable structure <sup>b)</sup><br>(local minimum structure)                    | heat of formation<br>(kcal/mol) | coefficient of LUMO |                    |
|--------------------|-------------------------------------------------------------------------------------|---------------------------------|---------------------|--------------------|
|                    |                                                                                     |                                 | $\alpha$ -position  | $\gamma$ -position |
| <b>8a-E</b>        | 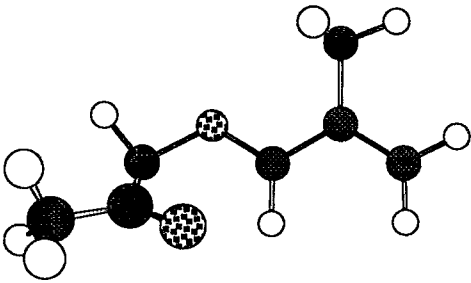   | 118.12                          | 0.7314              | -0.5552            |
| <b>8a-Z</b>        |   | 118.10                          | 0.7352              | -0.5529            |
| <b>8b-E</b>        |  | 126.96                          | 0.7170              | -0.5688            |
|                    |  | 127.00                          | 0.7284              | -0.5581            |

Table S2. (Continued)

| model<br>structure | most stable structure <sup>b)</sup><br>(local minimum structure) | heat of formation<br>(kcal/mol) | coefficient of LUMO |                    |
|--------------------|------------------------------------------------------------------|---------------------------------|---------------------|--------------------|
|                    |                                                                  |                                 | $\alpha$ -position  | $\gamma$ -position |

**8b-Z**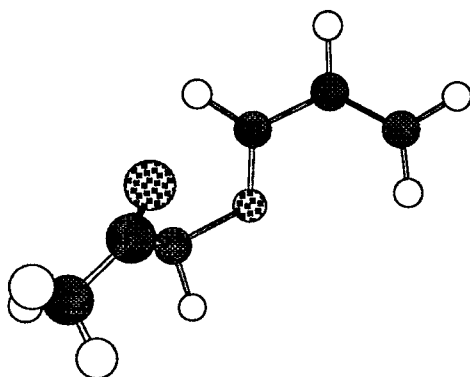

128.07

0.7266

-0.5646

- a) Calculations were carried out using program MOPAC with PM3 hamiltonian with PRECISE key word.  
b) structures were placed as  $\text{-C=C-C}^+$  plane was parallel to the paper.
